# Supplementary material
Source: PubMed Central journal article supplement (PMC11029594)
Supplement: 262_2014_1542_MOESM1_ESM.pdf [file 262_2014_1542_MOESM1_ESM.pdf]

## SUPPLEMENTAL FIGURE 1

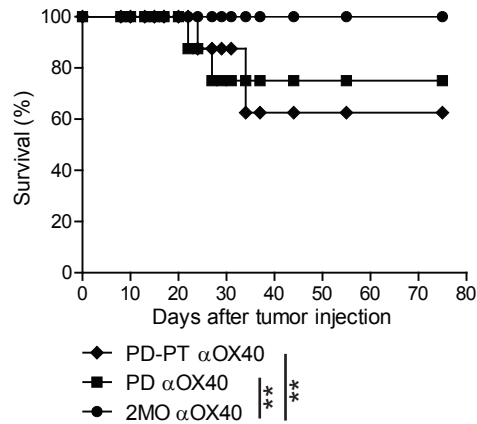

Dietary supplementation with pterostilbene (PD-PT) did not significantly increase  $\alpha$ OX40-mediated tumor free survival in aged mice. Two month old and 12 month old female Balb/c mice on a purified diet (PD) or a purified diet supplemented with 1 mg/kg pterostilbene (PD-PT) were injected s.c. with  $1 \times 10^5$  EMT6 tumor cells. Three and seven days later 200  $\mu$ g  $\alpha$ OX40 was injected i.p. and mice were monitored for tumor growth. Data are representative of two independent experiments with n=5-10 mice per experimental group.

## SUPPLEMENTAL FIGURE 2

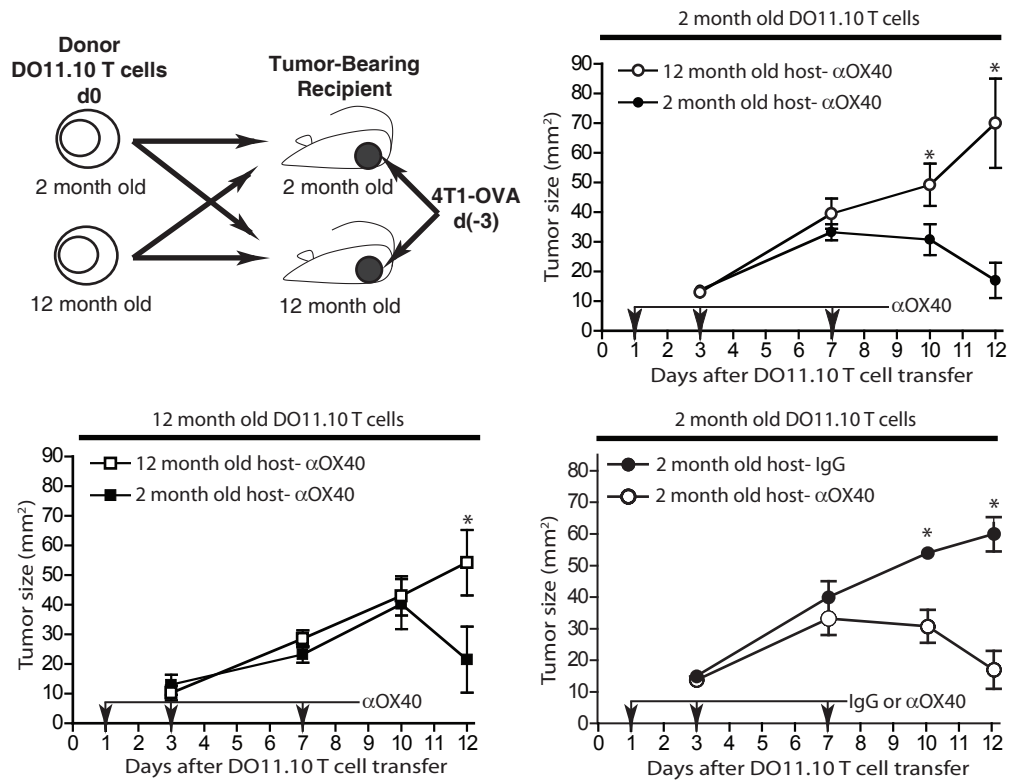

The effects of aging on  $\alpha$ OX40-mediated tumor-specific immune responses. Female Balb/c mice ages 2- and 12-months old (AL-LRD) were transplanted s.c. with  $5 \times 10^5$  ovalbumin-transduced 4T1 (4T1-OVA) tumor cells d(-3). CD4 T cells ( $2 \times 10^6$ ) from two- or 12-month old donor DO11.10 mice were adoptively transferred i.v. into two or 12-month old 4T1-OVA tumor-bearing recipient mice (see schematic cartoon) three days after tumor transplantation. Rat IgG or  $\alpha$ OX40 (250  $\mu$ g) was injected i.p. one, three and seven days after adoptive transfer, as identified by the arrows. Mice were then monitored for tumor growth for 12 days after adoptive transfer.
